# Supplementary material for: Tunable photoluminescence and an enhanced photoelectric response of Mn2+-doped CsPbCl3 perovskite nanocrystals via pressure-induced structure evolution
Source: Royal Society of Chemistry journal article supplement (doi:10.1039/c9nr03045j), 2019-01-01
Supplement: c9nr03045j1.pdf [file c9nr03045j1.pdf]

## Supporting Information

### **Tunable Photoluminescence and Enhanced Photoelectric Response of Mn<sup>2+</sup>-Doped CsPbCl<sub>3</sub> Perovskite Nanocrystals via Pressure-Induced Structure Evolution**

**Junkai Zhang<sup>a</sup>, Sihang Ji<sup>b</sup>, Yanzhang Ma<sup>c</sup>, Renquan Guan<sup>a</sup>, Xiaoxin Wu<sup>a</sup>, Xin Qu<sup>a</sup>, Bingmin Yan<sup>d,\*</sup>, Dongzhou Zhang<sup>e</sup>, Jialong Zhao<sup>a,\*</sup>, Jinghai Yang<sup>a,\*</sup>**

<sup>a</sup>Key Laboratory of Functional Materials Physics and Chemistry of the Ministry of Education, Jilin Normal University, Siping 136000, P. R. China

<sup>b</sup>Department of Physics, Jilin University, Changchun 130023, P. R. China

<sup>c</sup>Department of Mechanical Engineering, Texas Tech University, Lubbock, TX 79409, USA

<sup>d</sup>Center for High Pressure Science and Technology Advanced Research, Beijing 100094, P. R. China

<sup>e</sup>Hawai'i Institute of Geophysics and Planetology, School of Ocean and Earth Science and Technology, University of Hawai'i at Manoa, Honolulu, Hawaii 96822, USA

\*To whom correspondence should be addressed. E-mail: [bingmin.yan@hpstar.ac.cn](mailto:bingmin.yan@hpstar.ac.cn) (B. Yan), [zhaojl@ciomp.ac.cn](mailto:zhaojl@ciomp.ac.cn) (J. Zhao) and [jhyang1@jlnu.edu.cn](mailto:jhyang1@jlnu.edu.cn) (J. Yang).

## Experimental details

### Sample Preparation and Characterization.

$\text{Mn}^{2+}:\text{CsPbCl}_3$  NCs with a typical  $\text{Mn}^{2+}$ -doping concentration of 2.4% (relative to  $\text{Pb}^{2+}$ ) were synthesized using an improved one-pot injection method. The  $\text{PbCl}_2$  (0.2 mmol, 0.054 g) and  $\text{MnCl}_2$  (0.4 mmol, 0.05 g) were mixed with OLA (1.5 mL), OA (1.5 mL), TOP (2 mL), and ODE (5 mL) in a 50 mL three-necked flask. The reaction mixture was degassed at 110 °C for 30 mins and then heated up to 190 °C under an argon flow. A 0.25 mL portion of Cs-oleate precursor (made by dissolving  $\text{Cs}_2\text{CO}_3$ , 0.22 g, in OA, 0.65 mL, and ODE, 10 mL, at 150 °C) was quickly injected into the reaction solution, and maintained for 1 min to allow the growth of  $\text{Mn}^{2+}$ -doped perovskite NCs, followed by immersing the flask in an ice water bath to quench the reaction. For purification,  $\text{Mn}^{2+}:\text{CsPbCl}_3$  NCs were repeatedly precipitated by acetone/hexane, centrifuged, decanted, and suspended in hexane. The  $\text{Mn}^{2+}$  concentrations were monitored by inductively coupled plasma-mass spectrometry (ICP-MS) after each purification cycle to ensure elimination of all unincorporated  $\text{Mn}^{2+}$ , and the process was repeated until the  $\text{Mn}^{2+}$  concentrations became independent of further purification cycles, typically after 3 or 4 cycles. Absorption spectra were recorded on a UV-vis spectrophotometer (Shimadzu UV-2700). PL excitation spectra and PL decay curves were carried out using a spectrometer (Horiba Jobin Yvon Fluorolog-3) with a time-correlated single-photon counting lifetime spectroscopy system. The crystal structure and microstructural morphologies of the sample were measured at ambient pressure, using XRD with  $\lambda = 1.5418 \text{ \AA}$  from the  $\text{CuK}\alpha$  radiation (Rigaku D/max-2500) and TEM (JEOL 2100). A PerkinElmer Nexion350-X inductively coupled plasma-mass spectrometer (ICP-MS) was used for elemental analysis. The structural optimization, bond length and density of state for  $\text{CsPbCl}_3$  and  $\text{Mn}^{2+}:\text{CsPbCl}_3$  were performed in the framework of density functional theory (DFT) using the Vienna ab initio simulation package (VASP) [S1] with a  $2 \times 2$  supercell. The projector-augmented plane wave (PAW) [S2] approach was used to represent the ion-electron interaction. The electron exchange-correlation functional was treated using the generalized gradient approximation (GGA) proposed by Perdew, Burke and Ernzerhof (PBE) [S3]. The energy cutoff of the plane wave was set to be 360 eV with the energy precision of  $10^{-4}$  eV. The Brillouin zone was sampled with a  $2 \times 2 \times 2$   $\Gamma$ -centered Monkhorst-Pack k-point grid for geometry optimization and self-consistent calculations.

### **High-Pressure Generation.**

A symmetrical diamond anvil cell (DAC) with a pair of diamond anvils with 400  $\mu\text{m}$  culets was employed to generate high pressure. A T301 steel gasket was pre-indented to 40  $\mu\text{m}$  in thickness, and a hole with a 150  $\mu\text{m}$  diameter was drilled at the center of the dent as the sample chamber for high-pressure absorption, PL, and XRD measurements. The powder sample and a small ruby ball were placed into the sample chamber, and the *in situ* pressure was gauged by the  $R_1$  ruby fluorescence shift. Silicon oil was used as the pressure-transmitting medium. The schematic drawing of the sample assembly is clearly shown in Figure S1. A nonmagnetic rhenium sheet, used as another gasket, was pre-indented to 50  $\mu\text{m}$  in thickness. A hole with 200  $\mu\text{m}$  in diameter was drilled at the center of the indentation using a laser. Then, a mixture of alumina powder and epoxy was inserted and compressed into the hole as the insulating layer. Subsequently, another hole with 150  $\mu\text{m}$  was drilled and served as the sample chamber for high-pressure impedance spectra and photocurrent measurements. The thickness of the sample under high pressure was determined using a micrometer with a precision of 0.5  $\mu\text{m}$ . No pressure medium was loaded in order to avoid additional errors in electrical measurements. The ruby fluorescence method was also used for the pressure calibration.

### ***In situ* High-Pressure Absorption and PL Measurements.**

High-pressure absorption spectra were conducted using an Ocean Optics QE65000 scientific-grade UV-vis spectrophotometer. PL spectra were collected with Renishaw InVia spectrometer using a 325 nm continuous wave laser with an output power of 10 mW and a 50 times Leica optical microscope.

### ***In situ* High-Pressure Angle-dispersive XRD Measurements.**

High-pressure XRD experiments were conducted at the 13-BM-C station of the Advanced Photon Source (APS), Argonne National Laboratory (ANL) ( $\lambda=0.406750 \text{ \AA}$ ). The experimental parameters, including the distance between sample and detector, were calibrated using conventional  $\text{CeO}_2$  materials. Two-dimensional XRD images were induced into the format of intensity versus the diffraction angle ( $2\theta$ ), through integration via the FIT2D program.

### ***In situ* High-Pressure Impedance Spectra and Photocurrent Measurements.**

Parallel-plate capacitor electrodes and *Van der Pauw* configuration electrodes were integrated on the diamond culets for *in situ* high-pressure impedance spectra and photocurrent

measurements, respectively (Figure S2). The fabricated details of the different microcircuit probes on the diamond have been reported previously [S4,S5]. The impedance spectrum was obtained using a computer-controlled impedance analyzer (Solartron 1260), combined with a dielectric interface (Solartron 1296). A voltage signal with amplitude of 2 V, and frequency ranging from  $10^{-2}$  to  $10^7$  Hz was applied to the sample. The photocurrent was recorded by a CHI-760E electrochemical workstation. The illumination was simulated sunlight provided by a 500 W Xe lamp. The constant DC voltage of 5 V was applied to the sample. The interval time  $\Delta t$  between the light on and off was 20 s.

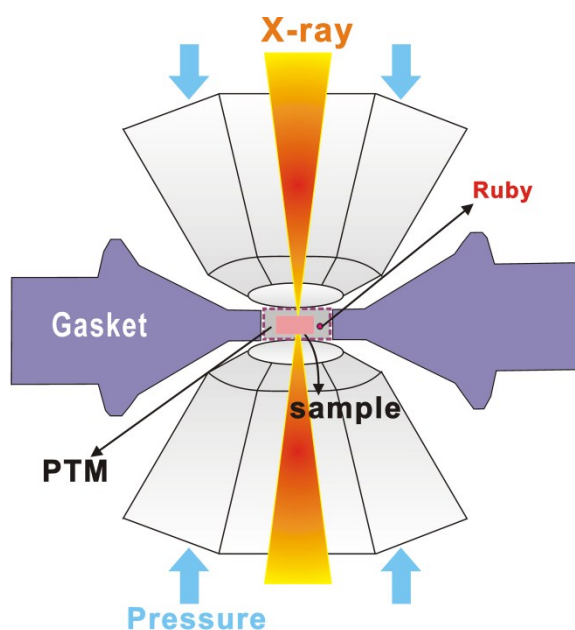

Figure S1. Schematic drawing of a symmetric DAC used in the high-pressure angle-dispersive XRD measurements.

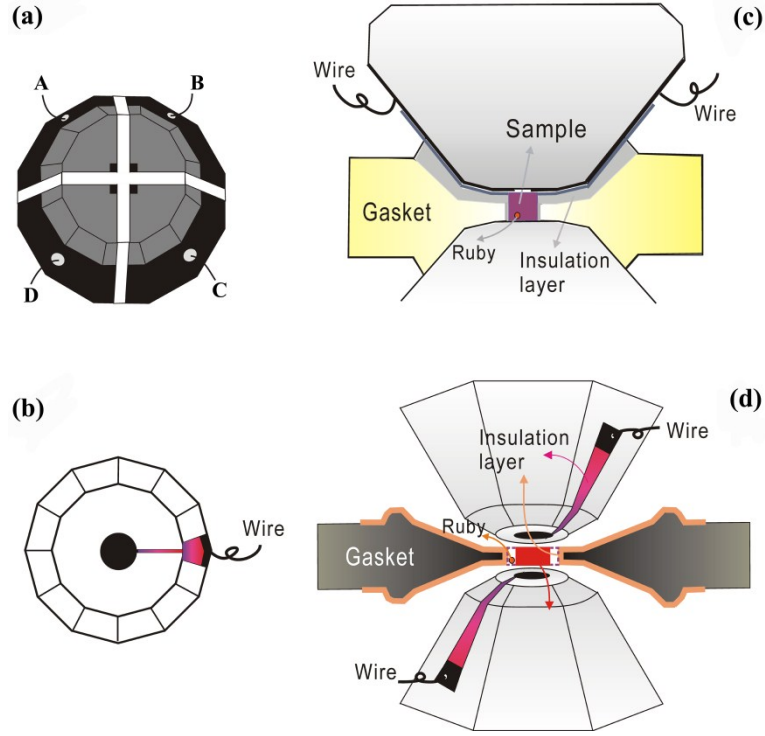

Figure S2. Configurations of the *Van der Pauw* microcircuit (a) and the parallel-plate capacitor electrodes (b) on a diamond anvil, respectively. (c) and (d) show the corresponding cross sections of the designed DAC to (a) and (b) respectively.

Figure S2 illustrates the configurations of the microcircuits using the *Van der Pauw* model and the parallel-plate capacitor electrodes, respectively, and the corresponding schematic views of the experimental setups can be found in [S6,S7].

*Van der Pauw* method utilizes the principle of the bridge circuit for resistance measurements and can successfully avoid contact and lead-wire resistance in measuring the resistance of samples in DAC [S8]. In this study, we adopted *Van der Pauw* electrodes with current reversal method to study the electrical properties, by which the following effects can be excluded, *i.e.* contact effect, heating effect of current and asymmetric effect of probing electrodes, *etc* [S6,S9]. In the resistivity measurements, a 10 mA (named  $I_1$ ) direct current was first applied from A to B (as shown in Figure S2(a)), and the voltage drop ( $V_1$ ) between C and D was recorded. Then, the same current ( $I_2$ ) was applied from A to D, and the voltage drop ( $V_2$ ) between B and C was recorded. The electrical resistivity was determined by the *Van der Pauw* equation:  $\exp(-\pi LR_A/\rho_S) + \exp(-\pi LR_B/\rho_S) = 1$ , where  $R_A$  and  $R_B$  are the measured resistances ( $R_A=V_1/I_1$ ,  $R_B=V_2/I_2$ ),  $L$  is the thickness of sample, and  $\rho_S$  is the electrical resistivity. The thickness of the sample under pressure was determined according to the measurement of changes in the distance between the back facets of the two anvils

with a modified micrometer having two symmetrical microprobes. By knowing the initial sample thickness, the thickness at pressures can be calculated accordingly [S10].

The impedance spectrum (IS) method is also available for *in-situ* analysis of materials under extreme conditions and can reveal many important properties such as conductivity, interface density, as well as dielectric characteristics [S11,S12]. During IS measurements, the major experimental problem is the poor contact between the electrode and the sample. The parallel-plate capacitor electrodes have fixed positions and well controlled shape in DAC, which can increase the contact area between the electrode and sample to the utmost extent, as a result effectively preventing the parasitic inductances from the chamber wall and the wire [S7]. In IS experiments, a small ac voltage signal should be introduced into the system being studied, the response of the system to this signal is always expressed by complex impedance  $Z=Z'+iZ''$ , where  $Z'$  and  $Z''$  are the real part and imaginary part of  $Z$ . They change as a function of the signal frequency and related parameters of the system. If  $Z$  (or  $Z'$  and  $Z''$ ) is determined, the characteristics of the system can be known.

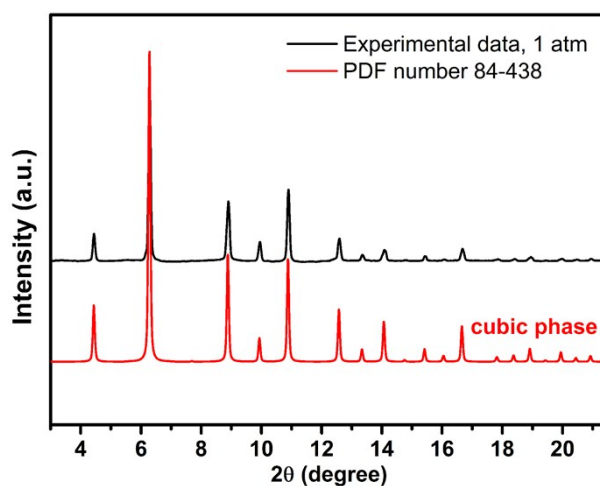

Figure S3. XRD patterns of as-synthesized  $\text{Mn}^{2+}:\text{CsPbCl}_3$  NCs.

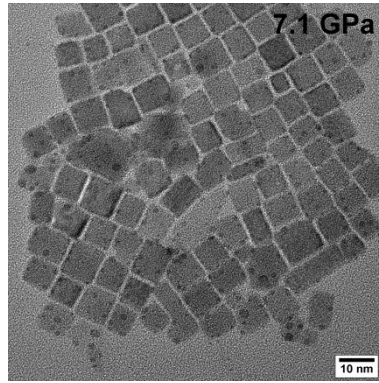

Figure S4. TEM image of  $\text{Mn}^{2+}:\text{CsPbCl}_3$  NCs quenched from 7.1 GPa in the *in-situ* high-pressure XRD measurements.

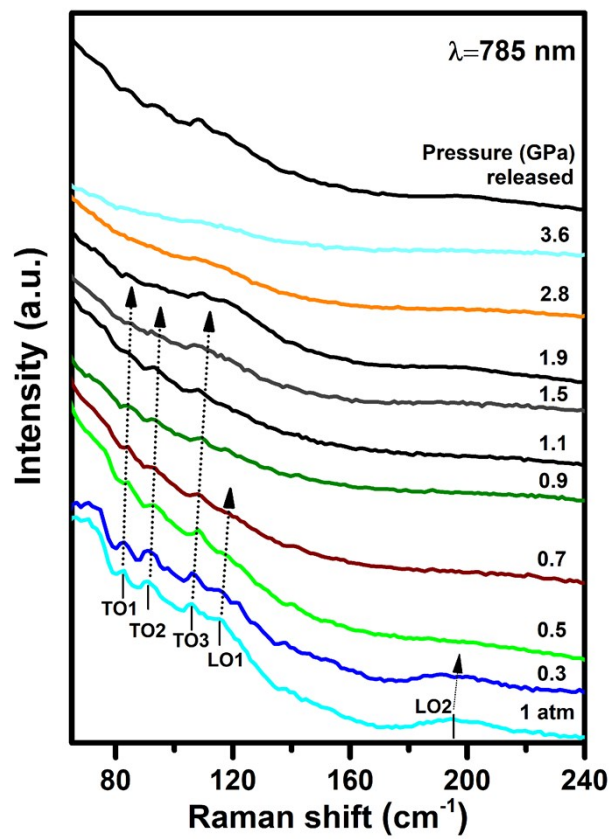

Figure S5. Raman spectra of as-synthesized  $\text{Mn}^{2+}:\text{CsPbCl}_3$  NCs under 785 nm excitation at selected pressures.

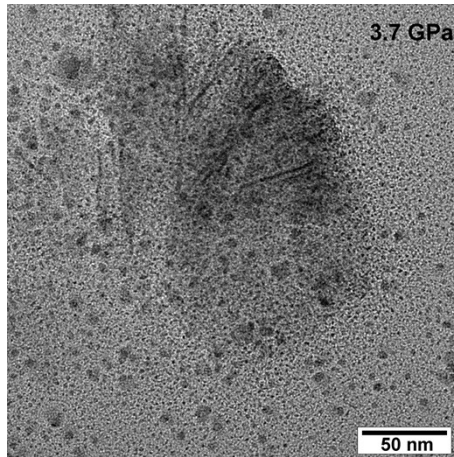

Figure S6. TEM image of thermally-annealed  $\text{Mn}^{2+}:\text{CsPbCl}_3$  NCs quenched from 3.7 GPa in the *in-situ* high-pressure impedance spectra measurements.

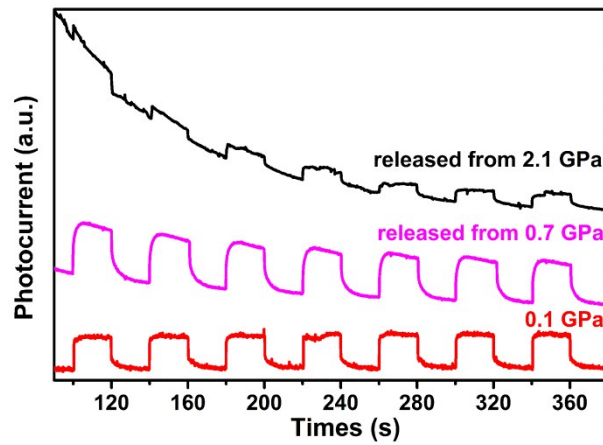

Figure S7. (a) Time-dependent photocurrent of thermally-annealed  $\text{Mn}^{2+}:\text{CsPbCl}_3$  NCs at 0.1 GPa (red line) during compression and after pressure is fully released from 0.7 GPa (magenta line) and 2.1 GPa (black line), respectively.

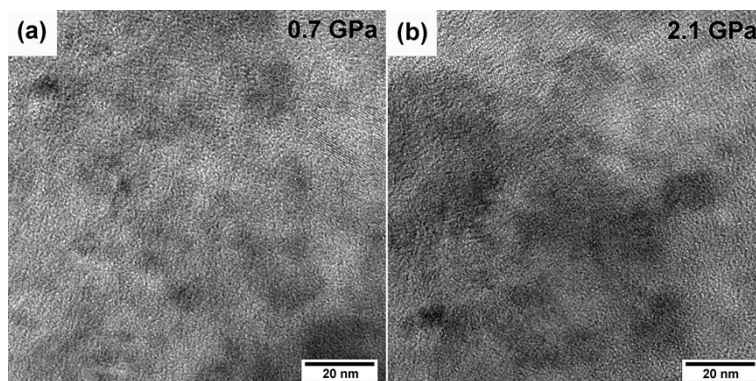

Figure S8. High-resolution TEM images of thermally-annealed  $\text{Mn}^{2+}:\text{CsPbCl}_3$  NCs quenched from selected pressures: 0.7 GPa (a) and 2.1 GPa (b), respectively, in the *in-situ* high-pressure photocurrent measurements.



## References

- [S1] Kresse, G.; Furthmüller, J.; Efficient Iterative Schemes for ab Initio Total-Energy Calculations using a Plane-Wave Basis Set. *Phys. Rev. B* **1996**, *54*, 11169-11186.
- [S2] Kresse, G.; Joubert, D.; From Ultrasoft Pseudopotentials to the Projector Augmented-Wave Method. *Phys. Rev. B* **1999**, *59*, 1758-1775.
- [S3] Perdew, J. P.; Burke, K.; Ernzerhof, M.; Generalized Gradient Approximation Made Simple. *Phys. Rev. Lett.* **1996**, *77*, 3865-3868.
- [S4] Gao, C.; Han, Y.; Ma, Y.; White, A.; Liu, H.; Luo, J.; Li, M.; He, C.; Hao, A.; Huang, X. Accurate Measurements of High Pressure Resistivity in a Diamond Anvil Cell. *Rev. Sci. Instrum.* **2005**, *76*, 083912.
- [S5] Wang, Q. L.; Liu, C. L.; Han, Y. H.; Gao, C. X.; Ma, Y. Z. The Determination of Ionic Transport Properties at High Pressures in a Diamond Anvil Cell. *Rev. Sci. Instrum.* **2016**, *87*, 123904.
- [S6] Gao C.; Han Y.; Ma Y.; White A.; Liu H.; Luo J.; Li M.; He C.; Hao A.; Huang X. Accurate Measurements of High Pressure Resistivity in a Diamond Anvil Cell. *Rev. Sci. Instrum.* **2005**, *76*, 083912-1-4.
- [S7] Wang Y.; Han Y. H.; Gao C. X.; Ma Y. Z.; Liu C. L.; Peng G.; Wu B. J.; Liu B.; Hu T. J.; Cui X. Y.; Ren W. B.; Li Y.; Su N. N.; Liu H. W.; Zou G. T. In situ Impedance Measurements in Diamond Anvil Cell under High Pressure. *Rev. Sci. Instrum.* **2010**, *81*, 013904-1-4.
- [S8] Mao H. K.; Bell P. M. Electrical Resistivity Measurements of Conductors in the Diamond-Window, High-Pressure cell. *Rev. Sci. Instrum.* **1981**, *52*, 615-616.
- [S9] Han Y. H.; Gao C. X.; Ma Y. Z.; Liu H. W.; Pan Y. W.; Luo J. F.; Li M.; He C. Y.; Huang X. W.; Zou G. T.; Integrated Microcircuit on a Diamond Anvil for High-Pressure Electrical Resistivity Measurement. *Appl. Phys. Lett.* **2005**, *86*, 0641042005-1-3.
- [S10] Li M.; Gao C. X.; Peng G.; He C. Y.; Hao A. M.; Huang X. W.; Zhang D. M.; Yu C. L.; Ma Y. Z.; Zou G. T. Thickness Measurement of Sample in Diamond Anvil Cell. *Rev. Sci. Instrum.* **2007**, *78*, 075106-1-3.
- [S11] Knight J.; Nur A. The Dielectric Constant of Sandstones, 60 kHz to 4 MHz. *Geophysics* **1987**, *52*, 644-654.
- [S12] Roberts J. J.; Tyburezy J. A. Impedance Spectroscopy of Single and Polycrystalline Olivine:

Evidence for Grain Boundary Transport. *Phys. Chem. Miner.* **1993**, *20*, 19-26.
